# Supplementary material for: Recovery of niobium and tantalum by solvent extraction from Sn–Ta–Nb mining tailings
Source: Royal Society of Chemistry journal article supplement (doi:10.1039/d0ra03331f), 2020-01-01

## Supplementary material

### Recovery of niobium and tantalum by solvent extraction from Sn–Ta–Nb mining tailings

Olga Rodríguez<sup>a</sup>, Francisco J. Alguacil<sup>a</sup>, Esther Escudero<sup>a</sup>, Irene García-Díaz<sup>a</sup>, Paloma Fernández<sup>b</sup>, Belén Sotillo<sup>b</sup>, Félix A. López<sup>a,\*</sup>

<sup>a</sup> Centro Nacional de Investigaciones Metalúrgicas (CENIM-CSIC). Avda. Gregorio del Amo, 8 28040 Madrid, Spain

<sup>b</sup> Facultad de Físicas. Universidad Complutense de Madrid (UCM). Pza. Ciencias, 1, 28040, Madrid (Spain)

Supplemental Table S1. Previous studies to determine the optimum leaching solution [17]

| Leaching solution                                | [Nb] (g/L) | [Ta] (g/L) |
|--------------------------------------------------|------------|------------|
| [HF]= 4 N                                        | 1.72       | 2.85       |
| [H <sub>2</sub> SO <sub>4</sub> ]= 8 N           | 40 ppm     | 80 ppm     |
| [HF]= 4 N/[H <sub>2</sub> SO <sub>4</sub> ]= 8 N | 1.62       | 2.72       |
| [HF]= 6 N/[H <sub>2</sub> SO <sub>4</sub> ]= 8 N | 1.90       | 3.27       |

Supplemental Table S2. Composition of the insoluble residues at different s/l ratios.

| % wt.                          | Insoluble residue                  |       |       |       |       |       |       |
|--------------------------------|------------------------------------|-------|-------|-------|-------|-------|-------|
|                                | Slag/leaching solution ratio (g/L) |       |       |       |       |       |       |
|                                | 20                                 | 30    | 40    | 50    | 60    | 75    | 100   |
| Ta <sub>2</sub> O <sub>5</sub> | 6.40                               | 6.43  | 5.49  | 9.75  | 9.56  | 5.49  | 6.54  |
| Nb <sub>2</sub> O <sub>5</sub> | 5.63                               | 6.55  | 4.50  | 7.82  | 7.79  | 4.46  | 5.23  |
| SiO <sub>2</sub>               | 2.39                               | 2.15  | 1.30  | 3.44  | 4.97  | 5.19  | 3.95  |
| SnO <sub>2</sub>               | 6.57                               | 6.31  | 8.87  | 9.24  | 8.84  | 7.47  | 7.89  |
| CaO                            | 30.43                              | 31.28 | 35.72 | 31.02 | 31.74 | 35.80 | 38.06 |
| MnO                            | 0.93                               | 1.10  | 0.46  | 0.76  | 1.16  | 0.73  | 0.58  |
| Fe <sub>2</sub> O <sub>3</sub> | 0.72                               | 0.80  | 0.37  | 0.51  | 0.76  | 0.46  | 0.43  |
| ZrO <sub>2</sub>               | 16.79                              | 13.86 | 11.38 | 8.06  | 6.66  | 4.94  | 2.63  |
| Al <sub>2</sub> O <sub>3</sub> | 5.98                               | 8.08  | 11.32 | 10.48 | 9.45  | 8.84  | 8.31  |
| Na <sub>2</sub> O              | 2.02                               | 1.19  | 4.49  | 2.06  | 1.34  | 5.72  | 1.38  |
| P <sub>2</sub> O <sub>5</sub>  | 1.47                               | 1.45  | 1.23  | 1.42  | 1.45  | 1.18  | 1.18  |
| CeO <sub>2</sub>               | 4.46                               | 3.95  | 2.85  | 2.57  | 2.25  | 2.19  | 3.12  |
| TiO <sub>2</sub>               | 0.24                               | 0.25  | 0.17  | 0.34  | 0.28  | 0.16  | 0.23  |
| Y <sub>2</sub> O <sub>3</sub>  | 2.17                               | 3.98  | 1.61  | 1.42  | 1.27  | 1.24  | 1.53  |
| La <sub>2</sub> O <sub>3</sub> | 2.14                               | 1.92  | 1.39  | 1.26  | 1.06  | 1.09  | 1.52  |
| Nd <sub>2</sub> O <sub>3</sub> | 3.16                               | 2.91  | 2.20  | 1.93  | 1.67  | 1.58  | 2.28  |
| K <sub>2</sub> O               | 0.13                               | 0.17  | 0.21  | 0.23  | 0.17  | 0.14  | 0.04  |
| HfO <sub>2</sub>               | 0.64                               | 0.64  | 0.60  | 0.42  | 0.34  | 0.28  | 0.11  |
| Gd <sub>2</sub> O <sub>3</sub> | 1.10                               | 0.94  | 0.79  | 0.69  | 0.61  | 0.57  | 0.79  |
| SO <sub>3</sub>                | 4.82                               | 5.00  | 4.77  | 5.80  | 7.36  | 13.09 | 12.49 |
| Sm <sub>2</sub> O <sub>3</sub> | 0.68                               | 0.62  | 0.56  | 0.46  | 0.46  | 0.42  | 0.50  |
| BaO                            | 0.16                               | 0.13  | 0.15  | 0.18  | 0.12  | 0.12  | 0.10  |
| Pr <sub>2</sub> O <sub>3</sub> | 0.54                               | 0.50  | 0.40  | 0.34  | 0.37  | 0.30  | 0.43  |
| ThO <sub>2</sub>               | 1.18                               | 1.08  | 0.80  | 0.70  | 0.63  | 0.60  | 0.81  |

|   |      |      |      |      |      |      |      |
|---|------|------|------|------|------|------|------|
| U | 0.55 | 0.48 | 0.44 | 0.38 | 0.33 | 0.35 | 0.33 |
|---|------|------|------|------|------|------|------|

Supplemental Table S3. Insoluble residue for each s/l ratio.

| Slag/leaching solution ratio (g/L) | Insoluble residue (% wt.) |
|------------------------------------|---------------------------|
| 20                                 | 30.40                     |
| 30                                 | 34.75                     |
| 40                                 | 28.38                     |
| 50                                 | 22.70                     |
| 60                                 | 32.08                     |
| 75                                 | 41.14                     |
| 100                                | 38.63                     |

Supplemental Table S4. Nb Precursor precipitation conditions.

| Sample | [Nb] <sub>0</sub> (g/L) | Nb sol.:NH <sub>3</sub> | Molar ratio (n <sub>Nb</sub> /n <sub>NH3</sub> ) | [Nb] <sub>f</sub> (g/L) | Yield (%) |
|--------|-------------------------|-------------------------|--------------------------------------------------|-------------------------|-----------|
| Nb_1   | 6.53                    | 5:1                     | 0.067                                            | 0.0942                  | 97.2      |
| Nb_2   | 5.41                    | 5:1                     | 0.056                                            | 0.0094                  | 98.3      |
| Nb_3   | 4.82                    | 3:1                     | 0.030                                            | 0.0017                  | 99.7      |
| Nb_4   | 6.20                    | 20:17                   | 0.015                                            | 0.0148                  | 99.8      |

Supplemental Table S5. Ta precursor precipitation conditions.

| Sample | [Ta] <sub>0</sub> (g/L) | [KF] (g/L) | Ta sol.:KF | Molar ratio (n <sub>Ta</sub> /n <sub>KF</sub> ) | [Ta] <sub>f</sub> (g/L) | Yield (%) |
|--------|-------------------------|------------|------------|-------------------------------------------------|-------------------------|-----------|
| Ta_1   | 9.30                    | 30         | 5:3        | 0.152                                           | 2.17                    | 74.5      |
| Ta_2   | 9.30                    | 60         | 2:1        | 0.008                                           | 1.16                    | 86.4      |
| Ta_3   | 7.53                    | 60         | 4:3        | 0.054                                           | 0.28                    | 96.3      |
| Ta_4   | 8.24                    | 90         | 3:1        | 0.088                                           | 0.65                    | 92.1      |
| Ta_5   | 7.01                    | 90         | 3:2        | 0.038                                           | 1.36                    | 80.6      |
| Ta_6   | 7.63                    | 90         | 1:1        | 0.027                                           | 0.29                    | 96.3      |
| Ta_7   | 9.43                    | 90         | 1:2        | 0.017                                           | 0.23                    | 97.6      |

Supplemental Table S6. Chemical composition of calcined and purified precursor determined by XRF.

| Oxide (% wt.)                  | Calcined precursor | Calcined precursor purified |
|--------------------------------|--------------------|-----------------------------|
| Ta <sub>2</sub> O <sub>5</sub> | 82.01              | 97.31                       |
| K <sub>2</sub> O               | 15.19              | -                           |
| Nb <sub>2</sub> O <sub>5</sub> | 1.67               | 1.64                        |
| CaO                            | 0.59               | 0.52                        |
| SnO <sub>2</sub>               | 0.45               | 0.19                        |
| Fe <sub>2</sub> O <sub>3</sub> | 0.05               | -                           |

|     |      |   |
|-----|------|---|
| NiO | 0.02 | - |
| ZnO | 0.01 | - |

Supplemental Figure S1. Nb<sub>2</sub>O<sub>5</sub>.nH<sub>2</sub>O nanoparticles observed by SEM (a) and by TEM (b-e).

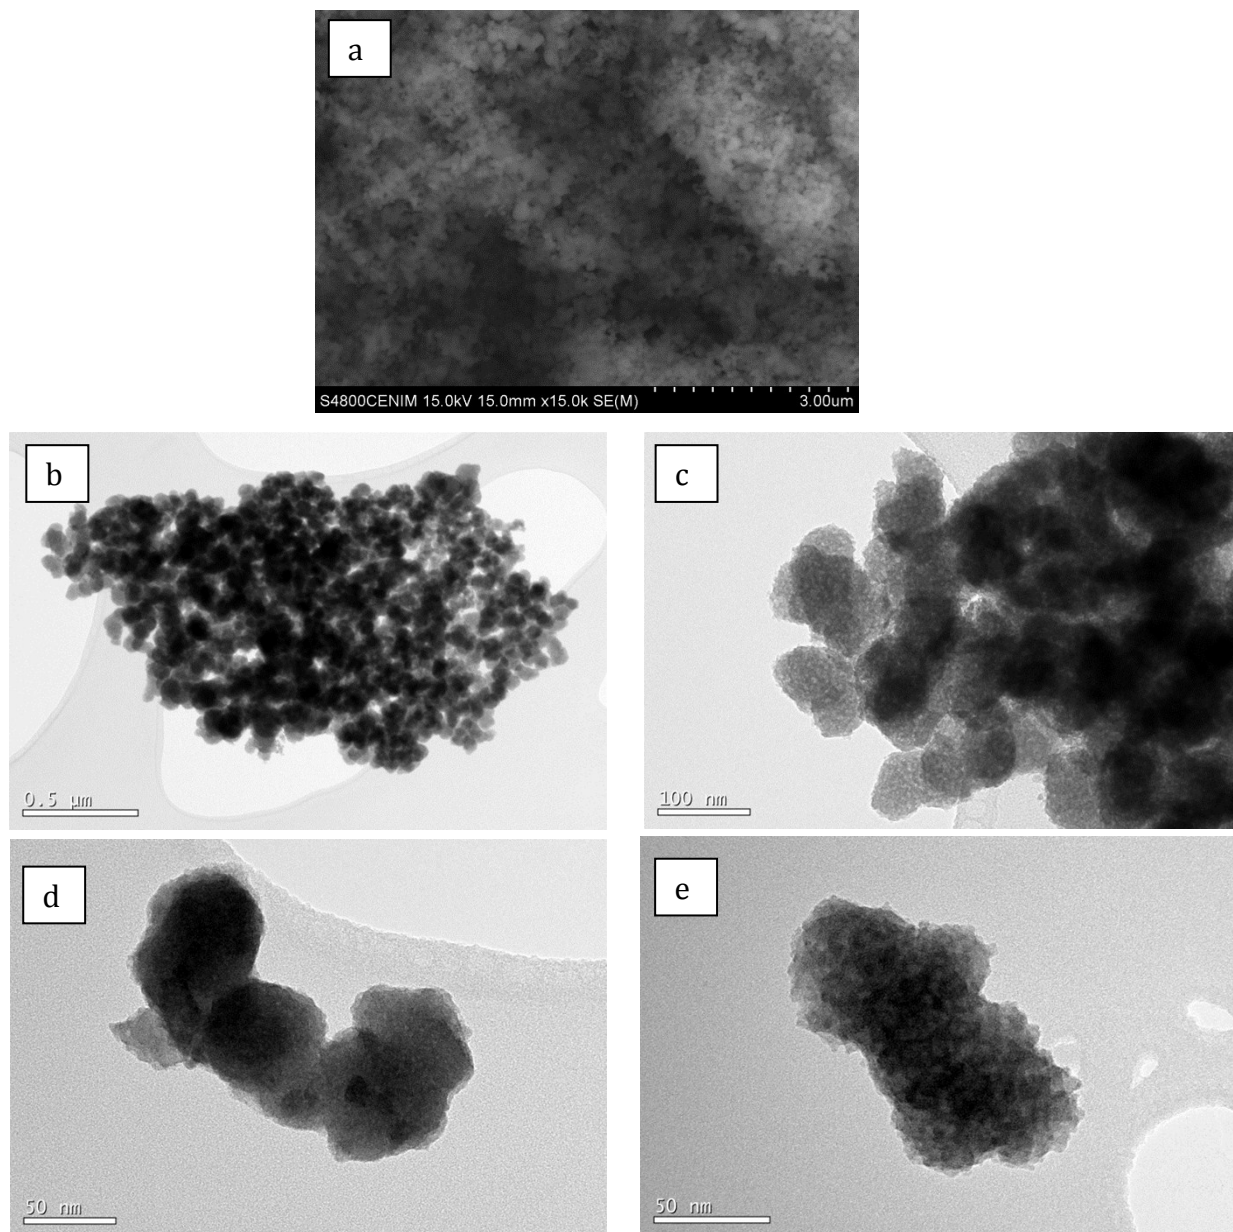

Supplemental Figure S2. TEM images of Nb<sub>2</sub>O<sub>5</sub> morphologies.

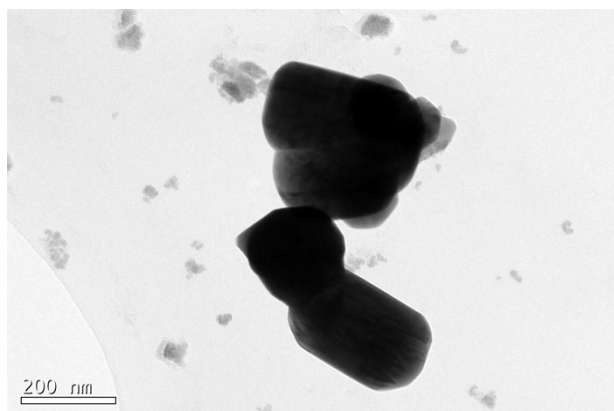

**a)**

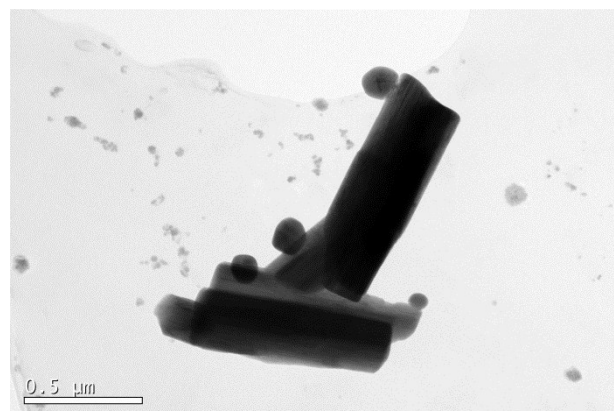

**b)**

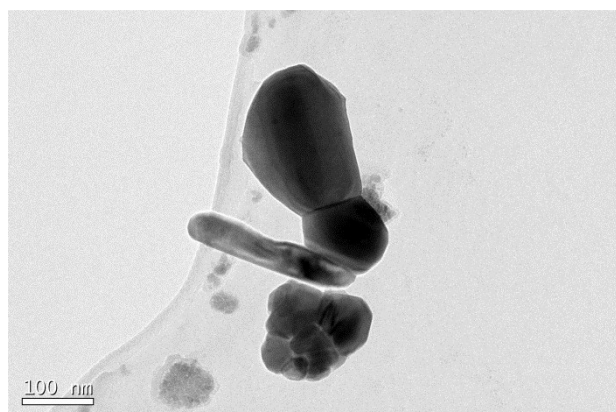

**c)**

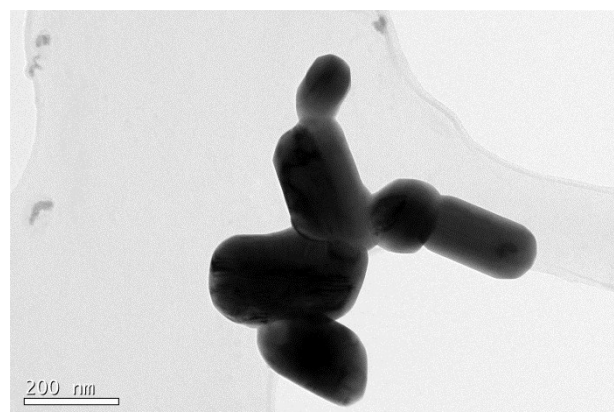

**d)**

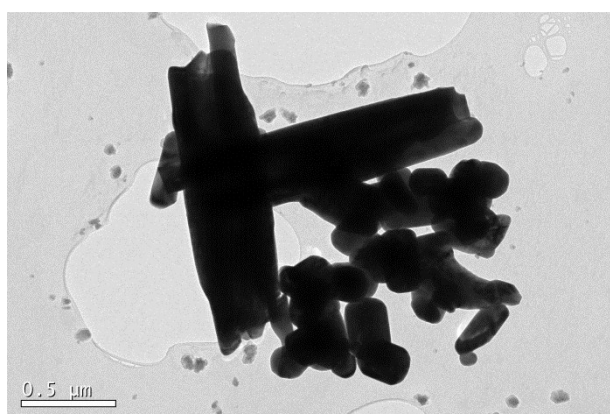

**e)**

Supplemental Figure S3. SEM images of Ta precursor.

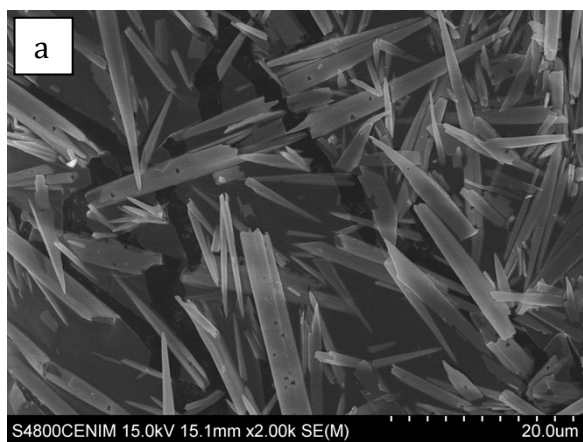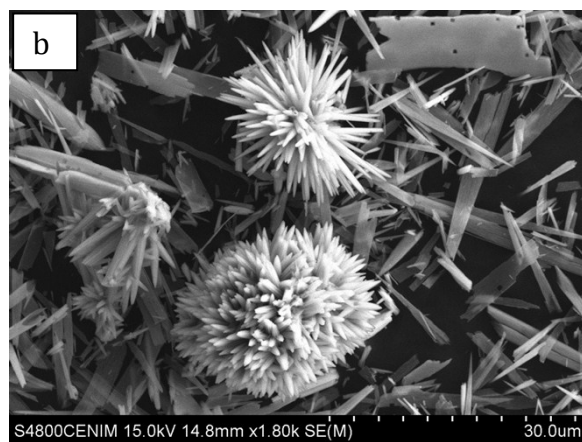

Supplement: d0ra03331f1.pdf [file d0ra03331f1.pdf]
